# Supplementary material for: Technology-Assisted Adolescent Dating Violence and Abuse: A Factor Analysis of the Nature of Electronic Communication Technology Used Across Twelve Types of Abusive and Controlling Behaviour
Source: Springer Nature journal article supplement (doi:10.1007/s10826-018-1255-5), 2018-09-17
Supplement: MOESM1 [file 16131834]

# Supplementary Materials

**TAADVA Victimisation Questionnaire**

| **Technology-Assisted Dating Abuse Received** | | | | | | | | | | | | | | | | | | | | |
| --- | --- | --- | --- | --- | --- | --- | --- | --- | --- | --- | --- | --- | --- | --- | --- | --- | --- | --- | --- | --- |
| **Please use the following KEY to rate for each technology media, how often you have RECEIVED the following behaviours from your current or a recent girlfriend or boyfriend in the LAST 12 MONTHS. Please answer as accurately and honestly as possible.** | | | | | | | | | | | | | | | | | | | | |
| **KEY** | **1** | | | **2** | | | | **3** | | | **4** | | | **5** | | | **6** | | | **7** |
| Never | | | At least once | | | | Monthly | | | Fort-nightly | | | Weekly | | | Daily | | | Hourly |
| **Insulting, mean or hurtful personal comments e.g. called you names, put downs etc.** | | | | | | | | | | | | | | | | | | | | |
| **Phone Call** | | | 1 | | | 2 | | 3 | 4 | | | 5 | | | 6 | | | 7 | | |
| **Text Message** | | | 1 | | | 2 | | 3 | 4 | | | 5 | | | 6 | | | 7 | | |
| **Instant Messenger** | | | 1 | | | 2 | | 3 | 4 | | | 5 | | | 6 | | | 7 | | |
| **Social Networking Site** | | | 1 | | | 2 | | 3 | 4 | | | 5 | | | 6 | | | 7 | | |
| **Picture Message** | | | 1 | | | 2 | | 3 | 4 | | | 5 | | | 6 | | | 7 | | |
| **Video Chat** | | | 1 | | | 2 | | 3 | 4 | | | 5 | | | 6 | | | 7 | | |
| **Email** | | | 1 | | | 2 | | 3 | 4 | | | 5 | | | 6 | | | 7 | | |
| **Chatroom** | | | 1 | | | 2 | | 3 | 4 | | | 5 | | | 6 | | | 7 | | |
| **Website/Blog** | | | 1 | | | 2 | | 3 | 4 | | | 5 | | | 6 | | | 7 | | |
|  | | |  | | |  | |  |  | | |  | | |  | | |  | | |
| **KEY** | **1** | | | **2** | | | **3** | | | **4** | | | **5** | | | **6** | | **7** | | |
| Never | | | At least once | | | Monthly | | | Fort-nightly | | | Weekly | | | Daily | | Hourly | | |
| **Comments or acts that were intended to embarrass, humiliate or shame you e.g. spreading rumours** | | | | | | | | | | | | | | | | | | | | |
| **Phone Call** | | | 1 | | | 2 | | 3 | 4 | | | 5 | | | 6 | | | 7 | | |
| **Text Message** | | | 1 | | | 2 | | 3 | 4 | | | 5 | | | 6 | | | 7 | | |
| **Instant Messenger** | | | 1 | | | 2 | | 3 | 4 | | | 5 | | | 6 | | | 7 | | |
| **Social Networking Site** | | | 1 | | | 2 | | 3 | 4 | | | 5 | | | 6 | | | 7 | | |
| **Picture Message** | | | 1 | | | 2 | | 3 | 4 | | | 5 | | | 6 | | | 7 | | |
| **Video Chat** | | | 1 | | | 2 | | 3 | 4 | | | 5 | | | 6 | | | 7 | | |
| **Email** | | | 1 | | | 2 | | 3 | 4 | | | 5 | | | 6 | | | 7 | | |
| **Chatroom** | | | 1 | | | 2 | | 3 | 4 | | | 5 | | | 6 | | | 7 | | |
| **Website/Blog** | | | 1 | | | 2 | | 3 | 4 | | | 5 | | | 6 | | | 7 | | |
|  | | |  | | |  | |  |  | | |  | | |  | | |  | | |
| **KEY** | **1** | | | **2** | | | | **3** | | | **4** | | | **5** | | | **6** | | **7** | |
| Never | | | At least once | | | | Monthly | | | Fort-nightly | | | Weekly | | | Daily | | Hourly | |
| **Shared or distributed private or personal information/images/video etc..** | | | | | | | | | | | | | | | | | | | | |
| **Phone Call** | | | 1 | | | 2 | | 3 | 4 | | | 5 | | | 6 | | | 7 | | |
| **Text Message** | | | 1 | | | 2 | | 3 | 4 | | | 5 | | | 6 | | | 7 | | |
| **Instant Messenger** | | | 1 | | | 2 | | 3 | 4 | | | 5 | | | 6 | | | 7 | | |
| **Social Networking Site** | | | 1 | | | 2 | | 3 | 4 | | | 5 | | | 6 | | | 7 | | |
| **Picture Message** | | | 1 | | | 2 | | 3 | 4 | | | 5 | | | 6 | | | 7 | | |
| **Video Chat** | | | 1 | | | 2 | | 3 | 4 | | | 5 | | | 6 | | | 7 | | |
| **Email** | | | 1 | | | 2 | | 3 | 4 | | | 5 | | | 6 | | | 7 | | |
| **Chatroom** | | | 1 | | | 2 | | 3 | 4 | | | 5 | | | 6 | | | 7 | | |
| **Website/Blog** | | | 1 | | | 2 | | 3 | 4 | | | 5 | | | 6 | | | 7 | | |
| **KEY** | **1** | | | **2** | | | **3** | | | **4** | | | **5** | | | **6** | | **7** | | |
| Never | | | At least once | | | Monthly | | | Fort-nightly | | | Weekly | | | Daily | | Hourly | | |
| **Threatening comments or behaviours that were intended to threaten harm, intimidate or bully you.** | | | | | | | | | | | | | | | | | | | | |
| **Phone Call** | | | 1 | | | 2 | | 3 | 4 | | | 5 | | | 6 | | | 7 | | |
| **Text Message** | | | 1 | | | 2 | | 3 | 4 | | | 5 | | | 6 | | | 7 | | |
| **Instant Messenger** | | | 1 | | | 2 | | 3 | 4 | | | 5 | | | 6 | | | 7 | | |
| **Social Networking Site** | | | 1 | | | 2 | | 3 | 4 | | | 5 | | | 6 | | | 7 | | |
| **Picture Message** | | | 1 | | | 2 | | 3 | 4 | | | 5 | | | 6 | | | 7 | | |
| **Video Chat** | | | 1 | | | 2 | | 3 | 4 | | | 5 | | | 6 | | | 7 | | |
| **Email** | | | 1 | | | 2 | | 3 | 4 | | | 5 | | | 6 | | | 7 | | |
| **Chatroom** | | | 1 | | | 2 | | 3 | 4 | | | 5 | | | 6 | | | 7 | | |
| **Website/Blog** | | | 1 | | | 2 | | 3 | 4 | | | 5 | | | 6 | | | 7 | | |
|  | | |  | | |  | |  |  | | |  | | |  | | |  | | |
| **KEY** | | **1** | | | **2** | | | **3** | | | **4** | | | **5** | | | **6** | | **7** | |
| Never | | | At least once | | | Monthly | | | Fort-nightly | | | Weekly | | | Daily | | Hourly | |
| **Been contacted to check on you and ask you where you are, what you are doing and who you are with.** | | | | | | | | | | | | | | | | | | | | |
| **Phone Call** | | | 1 | | | 2 | | 3 | 4 | | | 5 | | | 6 | | | 7 | | |
| **Text Message** | | | 1 | | | 2 | | 3 | 4 | | | 5 | | | 6 | | | 7 | | |
| **Instant Messenger** | | | 1 | | | 2 | | 3 | 4 | | | 5 | | | 6 | | | 7 | | |
| **Social Networking Site** | | | 1 | | | 2 | | 3 | 4 | | | 5 | | | 6 | | | 7 | | |
| **Picture Message** | | | 1 | | | 2 | | 3 | 4 | | | 5 | | | 6 | | | 7 | | |
| **Video Chat** | | | 1 | | | 2 | | 3 | 4 | | | 5 | | | 6 | | | 7 | | |
| **Email** | | | 1 | | | 2 | | 3 | 4 | | | 5 | | | 6 | | | 7 | | |
| **Chatroom** | | | 1 | | | 2 | | 3 | 4 | | | 5 | | | 6 | | | 7 | | |
| **Website/Blog** | | | 1 | | | 2 | | 3 | 4 | | | 5 | | | 6 | | | 7 | | |
|  | | |  | | |  | |  |  | | |  | | |  | | |  | | |
| **KEY** | | **1** | | | **2** | | | **3** | | | **4** | | | **5** | | | **6** | | **7** | |
| Never | | | At least once | | | Monthly | | | Fort-nightly | | | Weekly | | | Daily | | Hourly | |
| **Asked or pressured you to engage in sexual acts or to send messages/pictures that you did not want.** | | | | | | | | | | | | | | | | | | | | |
| **Phone Call** | | | 1 | | | 2 | | 3 | 4 | | | 5 | | | 6 | | | 7 | | |
| **Text Message** | | | 1 | | | 2 | | 3 | 4 | | | 5 | | | 6 | | | 7 | | |
| **Instant Messenger** | | | 1 | | | 2 | | 3 | 4 | | | 5 | | | 6 | | | 7 | | |
| **Social Networking Site** | | | 1 | | | 2 | | 3 | 4 | | | 5 | | | 6 | | | 7 | | |
| **Picture Message** | | | 1 | | | 2 | | 3 | 4 | | | 5 | | | 6 | | | 7 | | |
| **Video Chat** | | | 1 | | | 2 | | 3 | 4 | | | 5 | | | 6 | | | 7 | | |
| **Email** | | | 1 | | | 2 | | 3 | 4 | | | 5 | | | 6 | | | 7 | | |
| **Chatroom** | | | 1 | | | 2 | | 3 | 4 | | | 5 | | | 6 | | | 7 | | |
| **Website/Blog** | | | 1 | | | 2 | | 3 | 4 | | | 5 | | | 6 | | | 7 | | |
|  | |  | | |  | | |  | | |  | | |  | | |  | |  | |
| **KEY** | | **1** | | | **2** | | | **3** | | | **4** | | | **5** | | | **6** | | **7** | |
| Never | | | At least once | | | Monthly | | | Fort-nightly | | | Weekly | | | Daily | | Hourly | |
| **Been sent sexual or inappropriate messages/pictures etc that you did not want.** | | | | | | | | | | | | | | | | | | | | |
| **Phone Call** | | 1 | | | 2 | | | 3 | | | 4 | | | 5 | | | 6 | | 7 | |
| **Text Message** | | 1 | | | 2 | | | 3 | | | 4 | | | 5 | | | 6 | | 7 | |
| **Instant Messenger** | | 1 | | | 2 | | | 3 | | | 4 | | | 5 | | | 6 | | 7 | |
| **Social Networking Site** | | 1 | | | 2 | | | 3 | | | 4 | | | 5 | | | 6 | | 7 | |
| **Picture Message** | | 1 | | | 2 | | | 3 | | | 4 | | | 5 | | | 6 | | 7 | |
| **Video Chat** | | 1 | | | 2 | | | 3 | | | 4 | | | 5 | | | 6 | | 7 | |
| **Email** | | 1 | | | 2 | | | 3 | | | 4 | | | 5 | | | 6 | | 7 | |
| **Chatroom** | | 1 | | | 2 | | | 3 | | | 4 | | | 5 | | | 6 | | 7 | |
| **Website/Blog** | | 1 | | | 2 | | | 3 | | | 4 | | | 5 | | | 6 | | 7 | |
|  | |  | | |  | | |  | | |  | | |  | | |  | |  | |
| **KEY** | | **1** | | | **2** | | | **3** | | | **4** | | | **5** | | | **6** | | **7** | |
| Never | | | At least once | | | Monthly | | | Fort-nightly | | | Weekly | | | Daily | | Hourly | |
| **Checked your messages, contact histories or friend lists/networks.** | | | | | | | | | | | | | | | | | | | | |
| **Phone Call** | | | 1 | | | 2 | | 3 | 4 | | | 5 | | | 6 | | | 7 | | |
| **Text Message** | | | 1 | | | 2 | | 3 | 4 | | | 5 | | | 6 | | | 7 | | |
| **Instant Messenger** | | | 1 | | | 2 | | 3 | 4 | | | 5 | | | 6 | | | 7 | | |
| **Social Networking Site** | | | 1 | | | 2 | | 3 | 4 | | | 5 | | | 6 | | | 7 | | |
| **Picture Message** | | | 1 | | | 2 | | 3 | 4 | | | 5 | | | 6 | | | 7 | | |
| **Video Chat** | | | 1 | | | 2 | | 3 | 4 | | | 5 | | | 6 | | | 7 | | |
| **Email** | | | 1 | | | 2 | | 3 | 4 | | | 5 | | | 6 | | | 7 | | |
| **Chatroom** | | | 1 | | | 2 | | 3 | 4 | | | 5 | | | 6 | | | 7 | | |
| **Website/Blog** | | | 1 | | | 2 | | 3 | 4 | | | 5 | | | 6 | | | 7 | | |
|  | | |  | | |  | |  |  | | |  | | |  | | |  | | |
| **KEY** | | **1** | | | **2** | | | **3** | | | **4** | | | **5** | | | **6** | | **7** | |
| Never | | | At least once | | | Monthly | | | Fort-nightly | | | Weekly | | | Daily | | Hourly | |
| **Demanded your passwords to check messages, contact histories or friend lists/networks.** | | | | | | | | | | | | | | | | | | | | |
| **Phone Call** | | | 1 | | | 2 | | 3 | 4 | | | 5 | | | 6 | | | 7 | | |
| **Text Message** | | | 1 | | | 2 | | 3 | 4 | | | 5 | | | 6 | | | 7 | | |
| **Instant Messenger** | | | 1 | | | 2 | | 3 | 4 | | | 5 | | | 6 | | | 7 | | |
| **Social Networking Site** | | | 1 | | | 2 | | 3 | 4 | | | 5 | | | 6 | | | 7 | | |
| **Picture Message** | | | 1 | | | 2 | | 3 | 4 | | | 5 | | | 6 | | | 7 | | |
| **Video Chat** | | | 1 | | | 2 | | 3 | 4 | | | 5 | | | 6 | | | 7 | | |
| **Email** | | | 1 | | | 2 | | 3 | 4 | | | 5 | | | 6 | | | 7 | | |
| **Chatroom** | | | 1 | | | 2 | | 3 | 4 | | | 5 | | | 6 | | | 7 | | |
| **Website/Blog** | | | 1 | | | 2 | | 3 | 4 | | | 5 | | | 6 | | | 7 | | |
|  | |  | | |  | | |  | | |  | | |  | | |  | |  | |
| **KEY** | | **1** | | | **2** | | | **3** | | | **4** | | | **5** | | | **6** | | **7** | |
| Never | | | At least once | | | Monthly | | | Fort-nightly | | | Weekly | | | Daily | | Hourly | |
| **Deleted or removed contacts or friends or ex-partners.** | | | | | | | | | | | | | | | | | | | | |
| **Phone Call** | | | 1 | | | 2 | | 3 | 4 | | | 5 | | | 6 | | | 7 | | |
| **Text Message** | | | 1 | | | 2 | | 3 | 4 | | | 5 | | | 6 | | | 7 | | |
| **Instant Messenger** | | | 1 | | | 2 | | 3 | 4 | | | 5 | | | 6 | | | 7 | | |
| **Social Networking Site** | | | 1 | | | 2 | | 3 | 4 | | | 5 | | | 6 | | | 7 | | |
| **Picture Message** | | | 1 | | | 2 | | 3 | 4 | | | 5 | | | 6 | | | 7 | | |
| **Video Chat** | | | 1 | | | 2 | | 3 | 4 | | | 5 | | | 6 | | | 7 | | |
| **Email** | | | 1 | | | 2 | | 3 | 4 | | | 5 | | | 6 | | | 7 | | |
| **Chatroom** | | | 1 | | | 2 | | 3 | 4 | | | 5 | | | 6 | | | 7 | | |
| **Website/Blog** | | | 1 | | | 2 | | 3 | 4 | | | 5 | | | 6 | | | 7 | | |
|  | | |  | | |  | |  |  | | |  | | |  | | |  | | |
| **KEY** | | **1** | | | **2** | | | **3** | | | **4** | | | **5** | | | **6** | | **7** | |
| Never | | | At least once | | | Monthly | | | Fort-nightly | | | Weekly | | | Daily | | Hourly | |
| **Made you feel afraid not to respond to a call, text, message etc.** | | | | | | | | | | | | | | | | | | | | |
| **Phone Call** | | | 1 | | | 2 | | 3 | 4 | | | 5 | | | 6 | | | 7 | | |
| **Text Message** | | | 1 | | | 2 | | 3 | 4 | | | 5 | | | 6 | | | 7 | | |
| **Instant Messenger** | | | 1 | | | 2 | | 3 | 4 | | | 5 | | | 6 | | | 7 | | |
| **Social Networking Site** | | | 1 | | | 2 | | 3 | 4 | | | 5 | | | 6 | | | 7 | | |
| **Picture Message** | | | 1 | | | 2 | | 3 | 4 | | | 5 | | | 6 | | | 7 | | |
| **Video Chat** | | | 1 | | | 2 | | 3 | 4 | | | 5 | | | 6 | | | 7 | | |
| **Email** | | | 1 | | | 2 | | 3 | 4 | | | 5 | | | 6 | | | 7 | | |
| **Chatroom** | | | 1 | | | 2 | | 3 | 4 | | | 5 | | | 6 | | | 7 | | |
| **Website/Blog** | | | 1 | | | 2 | | 3 | 4 | | | 5 | | | 6 | | | 7 | | |
|  | | |  | | |  | |  |  | | |  | | |  | | |  | | |
| **KEY** | | **1** | | | **2** | | | **3** | | | **4** | | | **5** | | | **6** | | **7** | |
| Never | | | At least once | | | Monthly | | | Fort-nightly | | | Weekly | | | Daily | | Hourly | |
| **Prevented you from using electronic communication technology or from talking to others.** | | | | | | | | | | | | | | | | | | | | |
| **Phone Call** | | | 1 | | | 2 | | 3 | 4 | | | 5 | | | 6 | | | 7 | | |
| **Text Message** | | | 1 | | | 2 | | 3 | 4 | | | 5 | | | 6 | | | 7 | | |
| **Instant Messenger** | | | 1 | | | 2 | | 3 | 4 | | | 5 | | | 6 | | | 7 | | |
| **Social Networking Site** | | | 1 | | | 2 | | 3 | 4 | | | 5 | | | 6 | | | 7 | | |
| **Picture Message** | | | 1 | | | 2 | | 3 | 4 | | | 5 | | | 6 | | | 7 | | |
| **Video Chat** | | | 1 | | | 2 | | 3 | 4 | | | 5 | | | 6 | | | 7 | | |
| **Email** | | | 1 | | | 2 | | 3 | 4 | | | 5 | | | 6 | | | 7 | | |
| **Chatroom** | | | 1 | | | 2 | | 3 | 4 | | | 5 | | | 6 | | | 7 | | |
| **Website/Blog** | | | 1 | | | 2 | | 3 | 4 | | | 5 | | | 6 | | | 7 | | |
